# Supplementary material for: Pseudotemporal ordering of spatial lymphoid tissue microenvironment profiles trails Unclassified DLBCL at the periphery of the follicle
Source: PubMed Central journal article supplement (PMC10482233; doi:10.3389/fimmu.2023.1207959), 2023-08-23

# Supplementary Figure 1

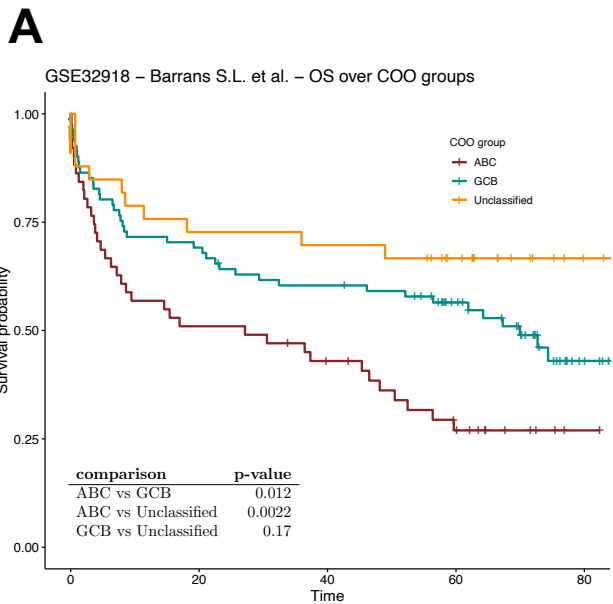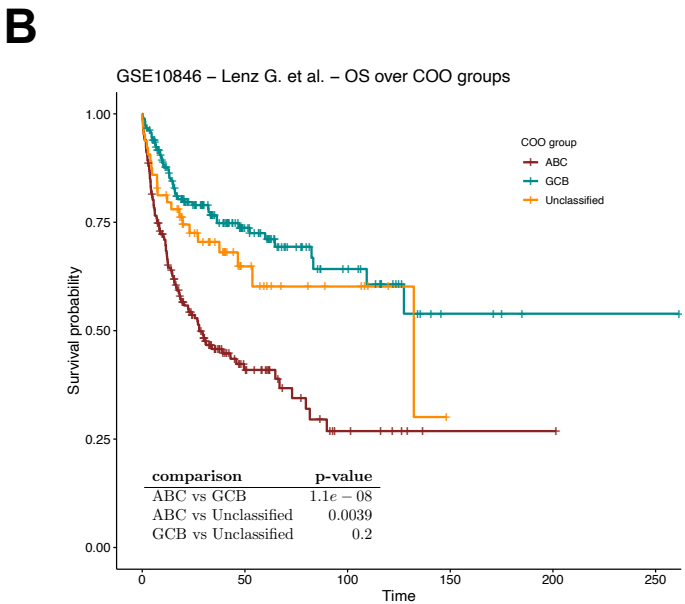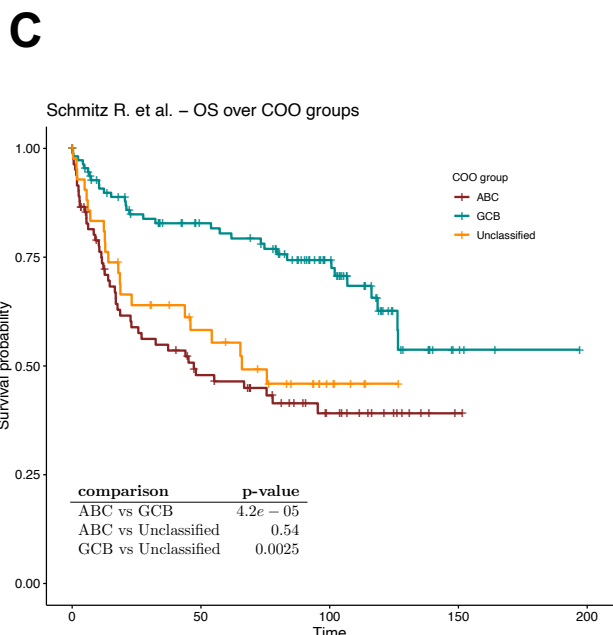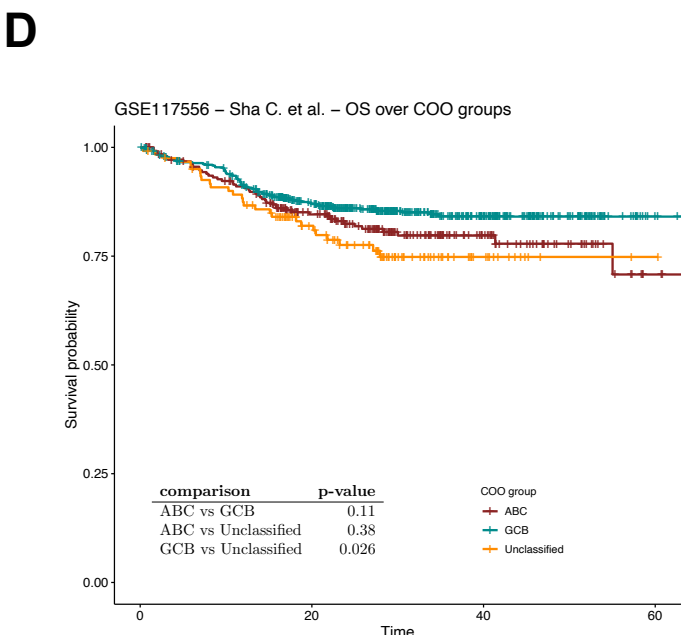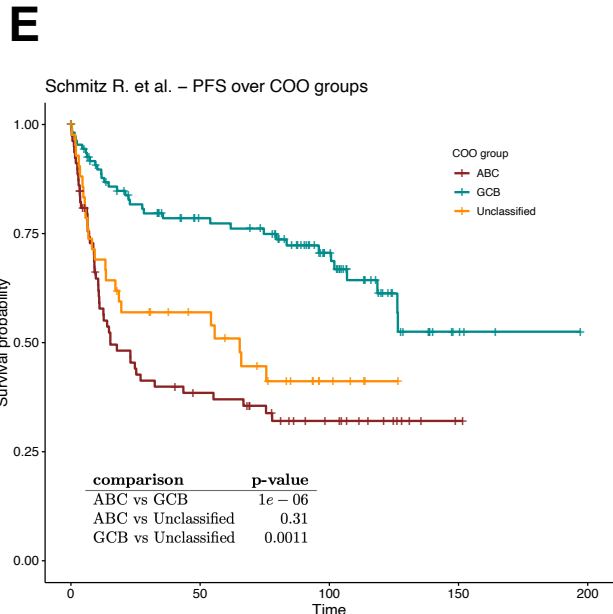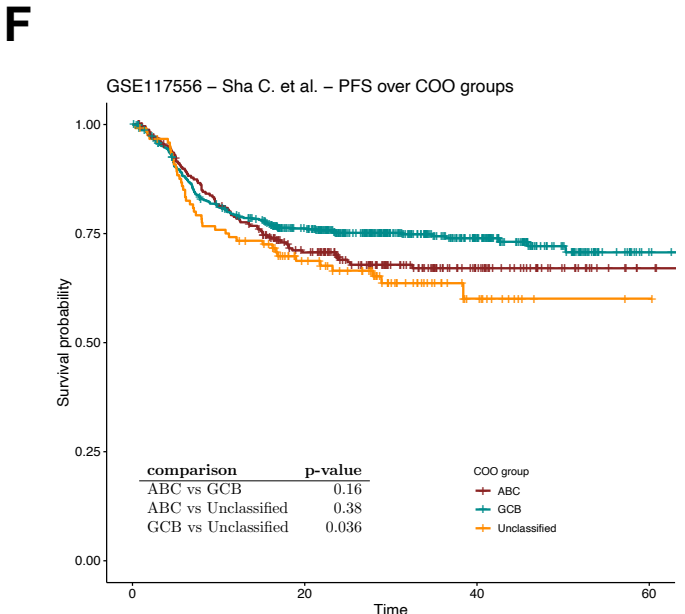

Supplement: Image_1.pdf [file Image_1.pdf]
